# Supplementary material
Source: Springer Nature journal article supplement (https://www.springermedizin.de/resource/supplementary/12889_2013_6404_MOESM2_ESM.pdf/9497850)
Supplement: MOESM2 [file 9497850]

## Enrollment

Assessed for eligibility  
(n=42 care centers)

Excluded (n=24)

- ◆ Not meeting inclusion criteria (n=18)
- ◆ Declined to participate (n= 4)
- ◆ Other reasons (n=2)

Randomized (n=18)

## Allocation

Allocated to intervention (n=9)

- ◆ Received allocated intervention (n=9)
- ◆ Did not receive allocated intervention (n=0)

Allocated to control (n=9)

- ◆ Received allocated control (n=8)
- ◆ Replaced control with matched center (n=1)
- ◆ Did not receive allocated control (n= 0)

## Follow-Up

- ◆ Lost to follow-up (n=0)
- ◆ Discontinued intervention (n=0)

- ◆ Lost to follow-up (n= 0)
- ◆ Discontinued control (n=0)

## Analysis

Analysed (n=9)

- ◆ Excluded from analysis (n=0)

Analysed (n=8)

- ◆ 2 small centers under same ownership analyzed as one center
- ◆ Excluded from analysis (n=0)
